# Supplementary material
Source: publisher figshare collection journal article supplement (https://acs.figshare.com/ndownloader/files/4167139)
Supplement: Supplementary file 1 [file 4167139]

#======================================================================

# CRYSTAL DATA

#----------------------------------------------------------------------

data_VESTA_phase_1


_pd_phase_name                         'TiO2-B 1.25 Li'
_cell_length_a                         12.46860
_cell_length_b                         4.11207
_cell_length_c                         6.52162
_cell_angle_alpha                      90
_cell_angle_beta                       108.02464
_cell_angle_gamma                      90
_symmetry_space_group_name_H-M         'C 2/m'
_symmetry_Int_Tables_number            12

loop_
_symmetry_equiv_pos_as_xyz
   'x, y, z'
   '-x, -y, -z'
   '-x, y, -z'
   'x, -y, z'
   'x+1/2, y+1/2, z'
   '-x+1/2, -y+1/2, -z'
   '-x+1/2, y+1/2, -z'
   'x+1/2, -y+1/2, z'

loop_
   _atom_site_label
   _atom_site_occupancy
   _atom_site_fract_x
   _atom_site_fract_y
   _atom_site_fract_z
   _atom_site_thermal_displace_type
   _atom_site_B_iso_or_equiv
   _atom_site_type_symbol
   Li-C'    1.0    0            0            0           Biso  1.000  Li
   Li-A2    1.0    0.94573      0.50000      0.64678     Biso  1.000  Li
   Li-A1    1.0    0.18114      0.50000      0.99836     Biso  1.000  Li
   Ti1      1.0    0.21906      1.00000      0.33423     Biso  1.000  Ti
   Ti5      1.0    0.11303      1.00000      0.67141     Biso  1.000  Ti
   O1       1.0    0.15927      1.00000      0.99772     Biso  1.000  O
   O5       1.0    0.28873      0            0.68070     Biso  1.000  O
   O9       1.0    0.05369      1.00000      0.33009     Biso  1.000  O
   O13      1.0    0.38934      0            0.32635     Biso  1.000  O
